# Supplementary material for: Loss of the EPH receptor B6 contributes to colorectal cancer metastasis
Source: PubMed Central journal article supplement (PMC5337985; doi:10.1038/srep43702), 2017-03-06

# SUPPLEMENTARY MATERIALS

## Loss of the EPH receptor B6 contributes to colorectal cancer metastasis

Silvia Mateo-Lozano<sup>1</sup>, Sarah Bazzocco<sup>1</sup>, Paulo Rodrigues<sup>1</sup>, Rocco Mazzolini<sup>1</sup>, Elena Andretta<sup>1</sup>, Higinio Dopeso<sup>1</sup>, Yolanda Fernández<sup>2,3,4</sup>, Edgar del Llano<sup>1</sup>, Josipa Bilic<sup>1</sup>, Lucía Suarez-López<sup>2,3</sup>, Irati Macaya<sup>1</sup>, Fernando Cartón-García<sup>1</sup>, Rocio Nieto<sup>1</sup>, Lizbeth Jimenez<sup>1</sup>, Priscila Marcondes<sup>1</sup>, Yaiza Nuñez<sup>1</sup>, Elsa Afonso<sup>1</sup>, Karina Cacci<sup>5</sup>, Javier Hernández-Losa<sup>5</sup>, Stefania Landolfi<sup>5</sup>, Ibane Abasolo<sup>2,3</sup>, Santiago Ramón y Cajal<sup>5</sup>, John M. Mariadason<sup>6</sup>, Simo Schwartz Jr<sup>2,3</sup>, Toshimitsu Matsui<sup>7</sup>, Diego Arango<sup>1\*</sup>.

A

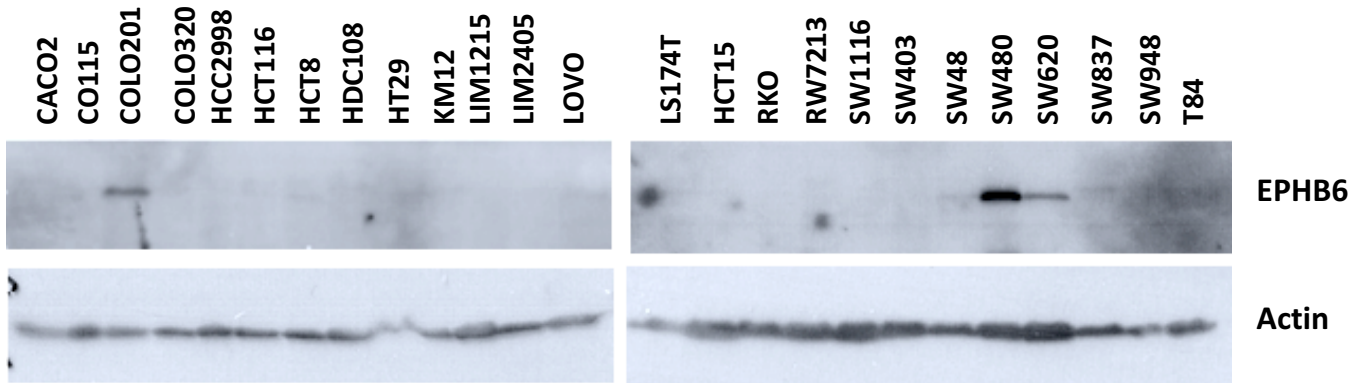

B

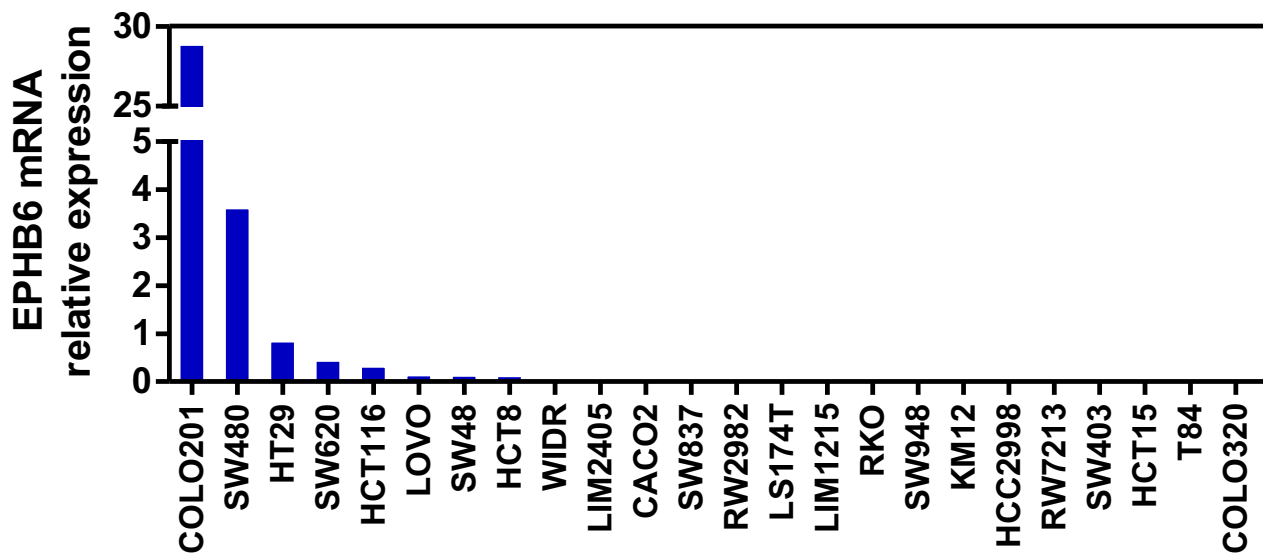

**Supplementary Figure 1: EPHB6 levels in colorectal cancer cell lines.** A) The relative protein levels of EPHB6 were assessed by Western blotting in a panel of 25 colorectal cancer cell lines. B) The relative mRNA levels of EPHB6 were assessed by quantitative Real-Time RT-PCR in 24 of these colorectal cancer cell lines.



A

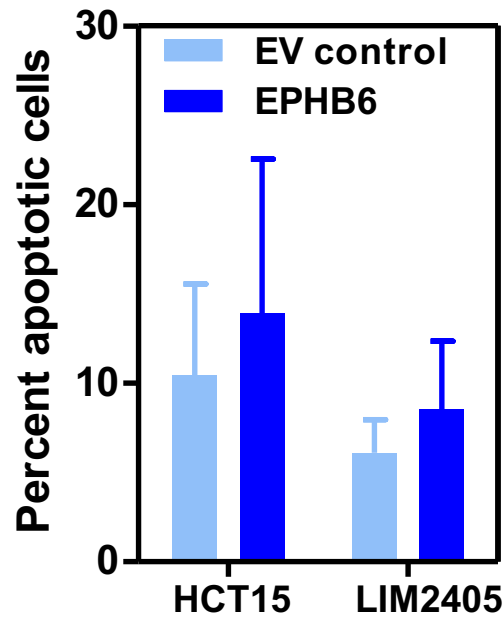

B

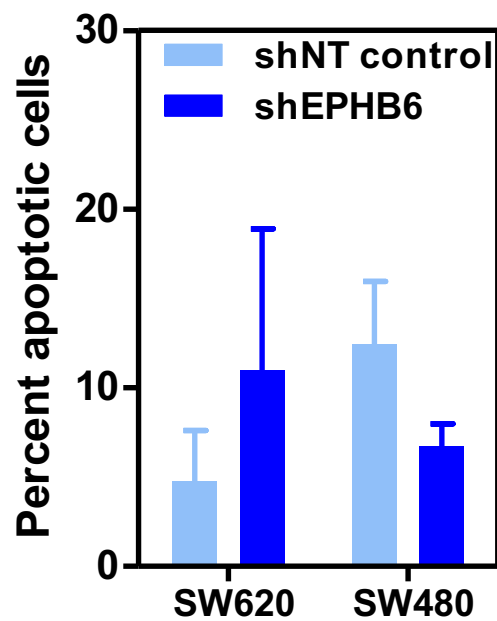

**Supplementary Figure 2: Effects of EPHB6 modulation on anoikis.** The number of apoptotic cells after growth in non-adherent conditions was quantified by propidium iodide staining and FACS analysis in colon cancer cells with EPHB6 overexpression (A) or downregulation (B). The mean  $\pm$  SEM of three independent experiments carried out in triplicate is shown.

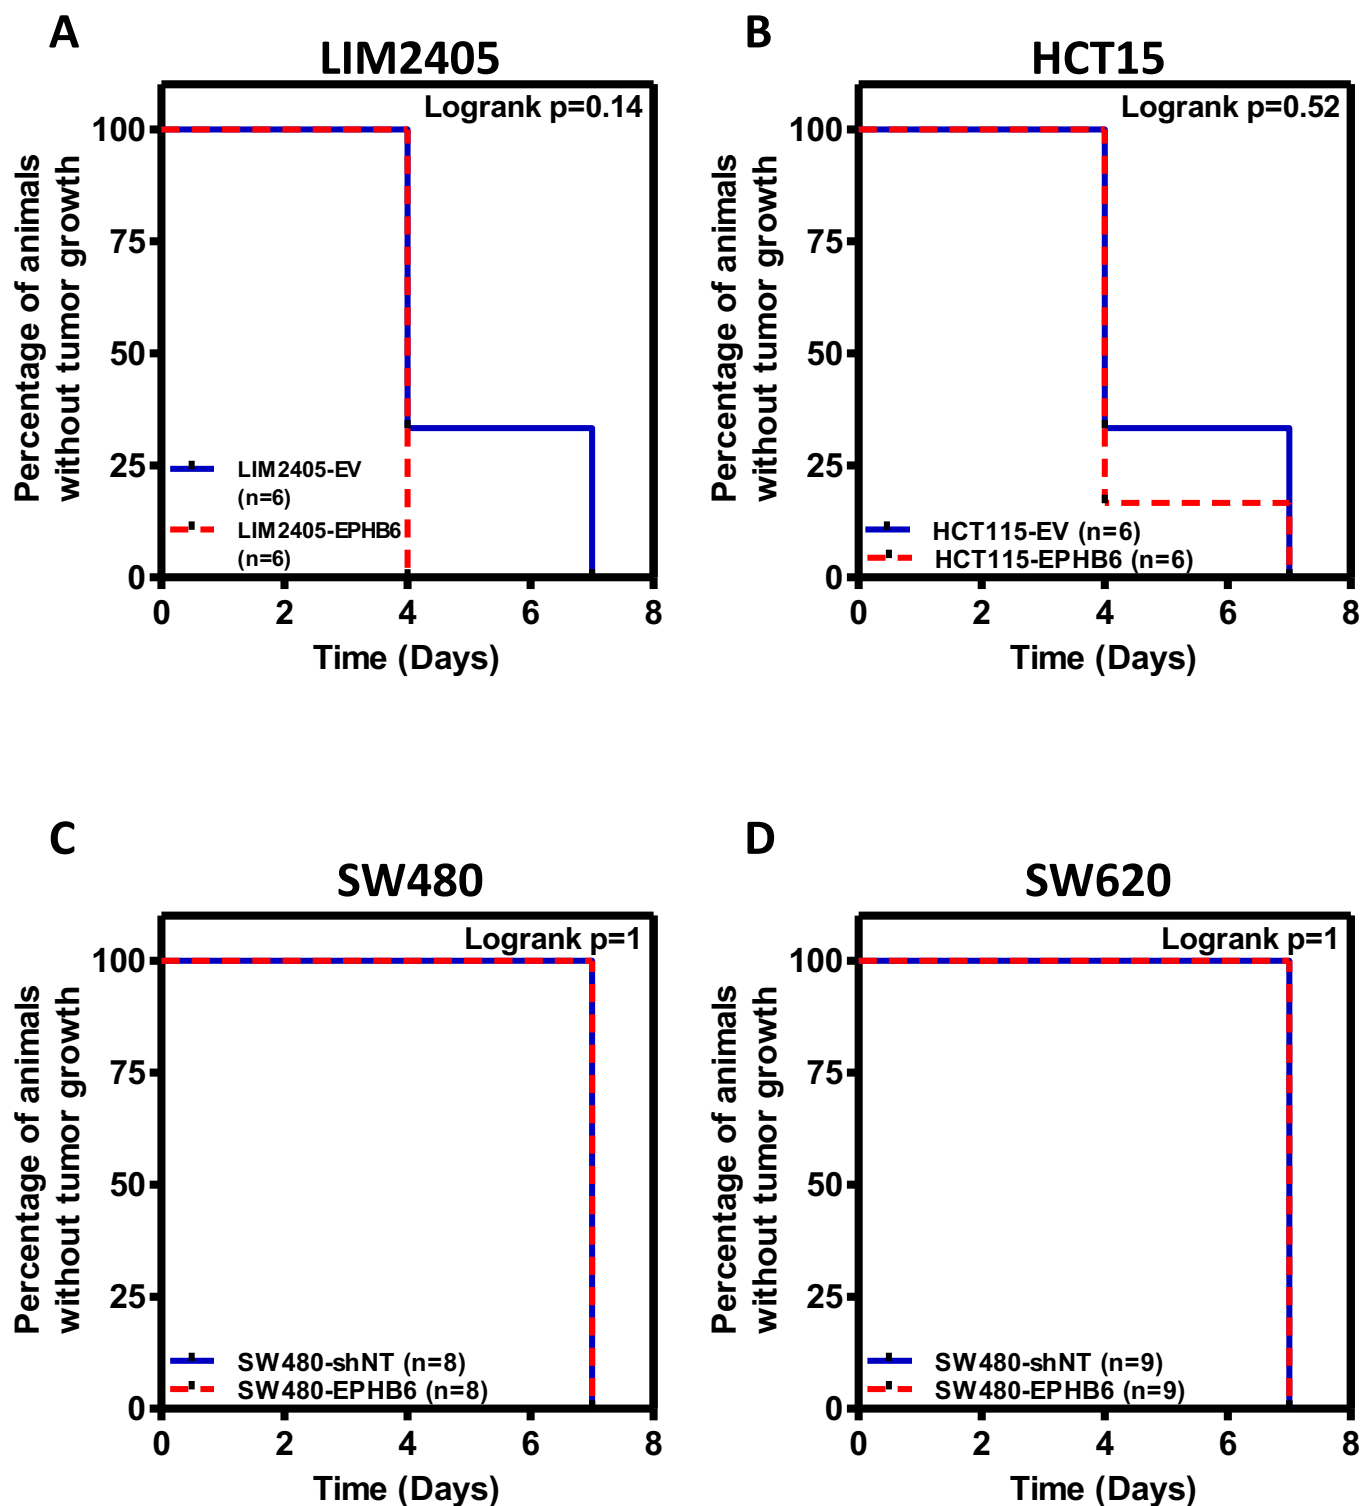

**Supplementary Figure 3: Tumor latency after subcutaneous implantation of colon cancer cells.** Kaplan-Meier curves showing differences in the time to initial tumor detection after subcutaneous implantation in NOD/SCID mice of EPHB6 overexpressing LIM2405 (A) and HCT15 (B) cells or EPHB6 knockdown SW480 (C) and SW620 (D) cells, compared to the corresponding control cells. n=number of animals. Logrank  $p > 0.14$ .

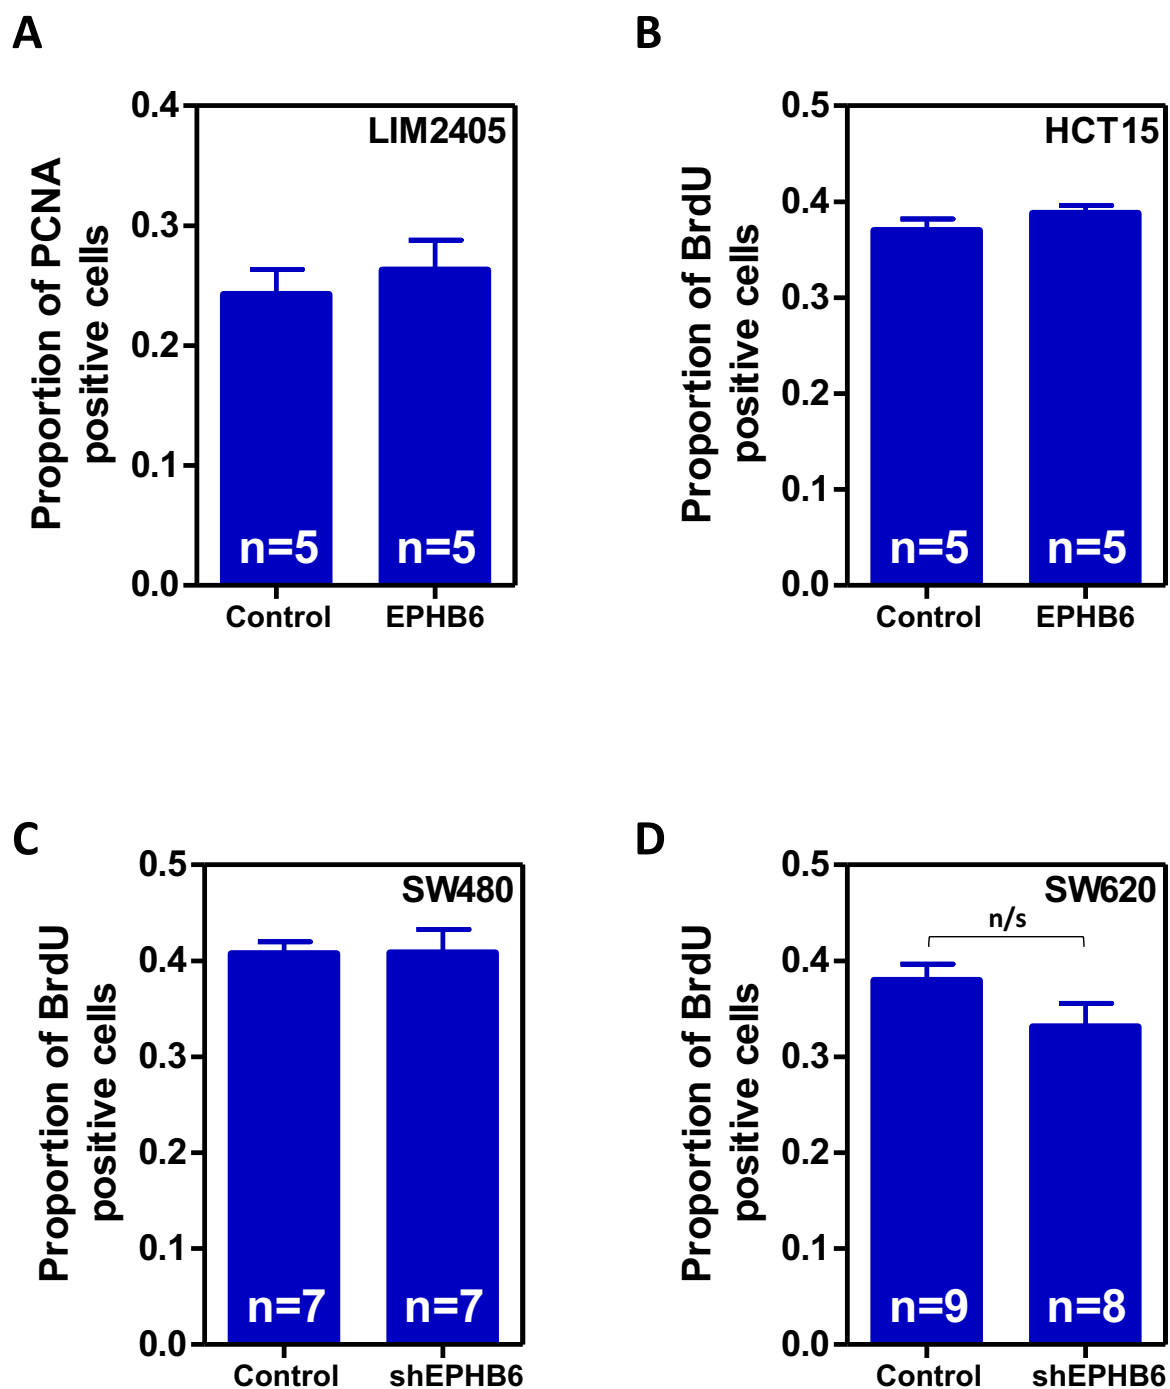

**Supplementary Figure 4: Proliferation in subcutaneous xenografts of colon cancer cells with modulation of EPHB6 expression.** The number of proliferating cells after EPHB6 overexpression in LIM2405 (A) and HCT15 (B) cells or EPHB6 knockdown in SW480 (C) and SW620 (D) cells was quantification by scoring the number of PCNA (A) or bromodeoxyuridine (BrdU; B-D) immunostained cells in subcutaneous xenografts of these lines in NOD/SCID mice. The mean  $\pm$  SEM is shown. n/s: non significant p value ( $p > 0.05$ ; Student's T-Test).

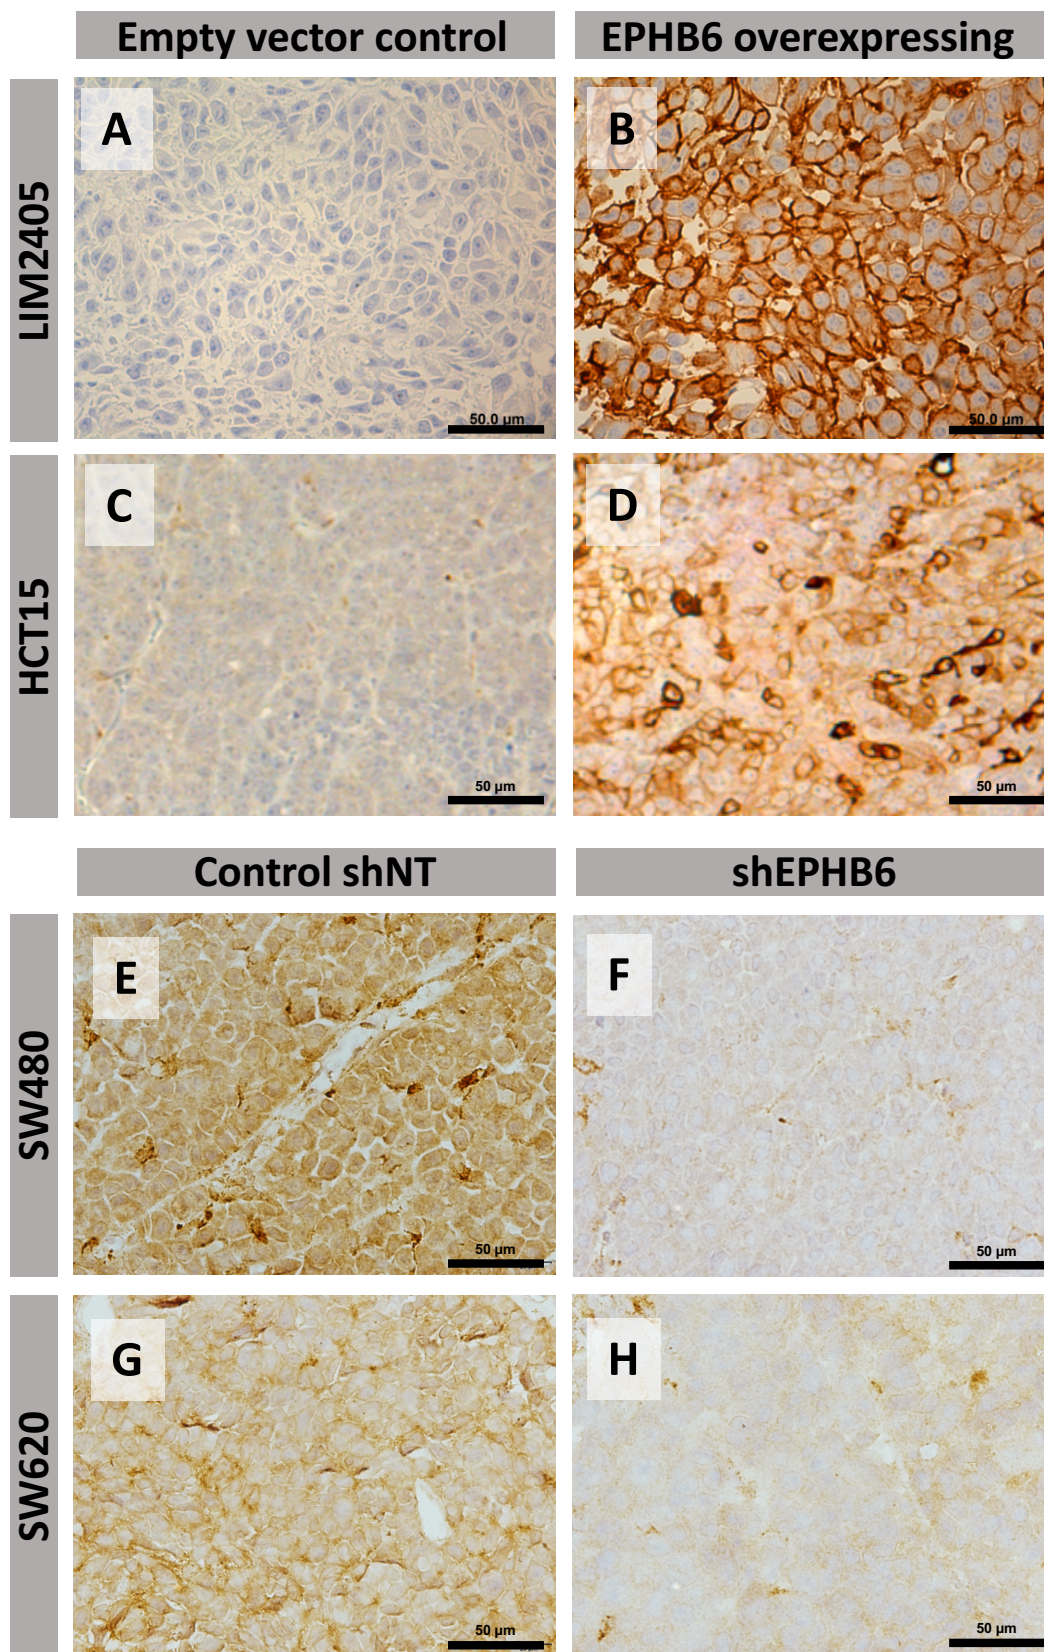

**Supplementary Figure 5: Confirmation of EPHB6 modulation in subcutaneous xenografts.** Immunohistochemistry with a mouse monoclonal anti-EPHB6 antibody (Abnova; clone 5D8) demonstrated EPHB6 overexpression on LIM2405 (A-B) and HCT15 (C-D) subcutaneous xenografts. Reduced EPHB6 levels were observed in the subcutaneous xenografts of SW480-shEPHB6 (F) and SW620-shEPHB6 (H) cells compared to the corresponding SW480-shNT (E) and SW620-shNT (H) control cells.



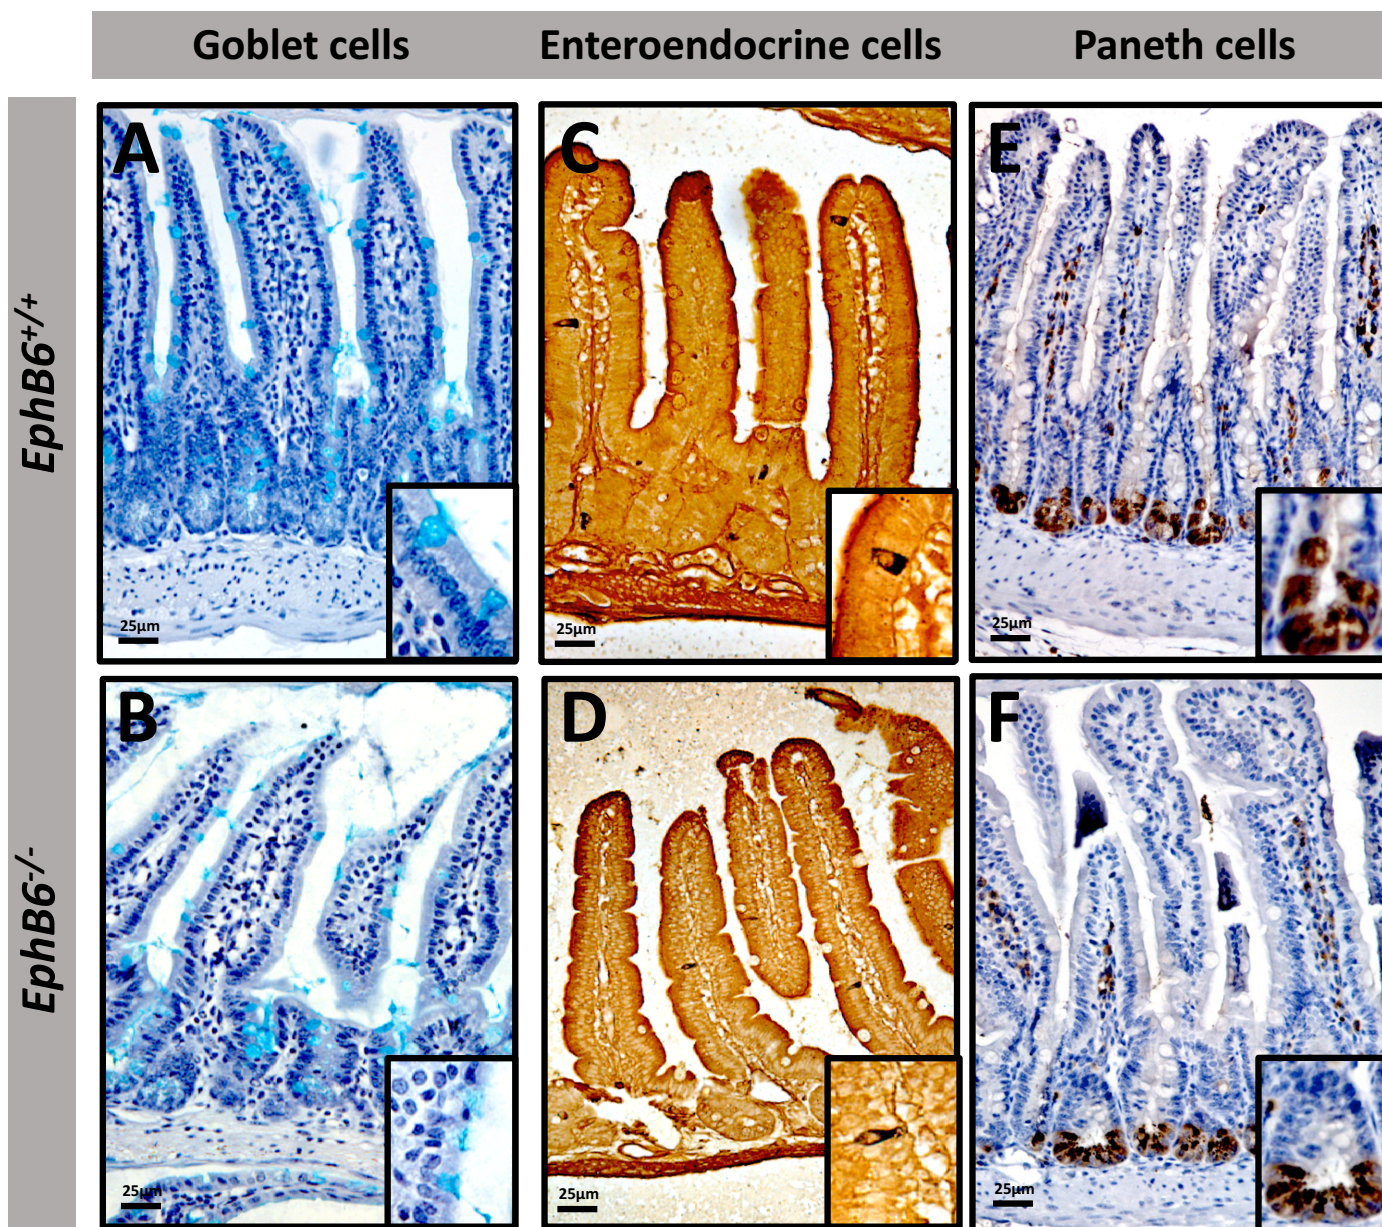

**Supplementary Figure 6: No defects on epithelial cell positioning are observed in *Ephb6* knockout mice.** No gross abnormalities were observed in the localization of goblet (A-B), enteroendocrine (C-D) or Paneth cells (E-F) in the small intestine of *EphB6* wild type (A, C and E) or knockout (B, D and F) mice. Cells with positive staining are highlighted in the figure insets.

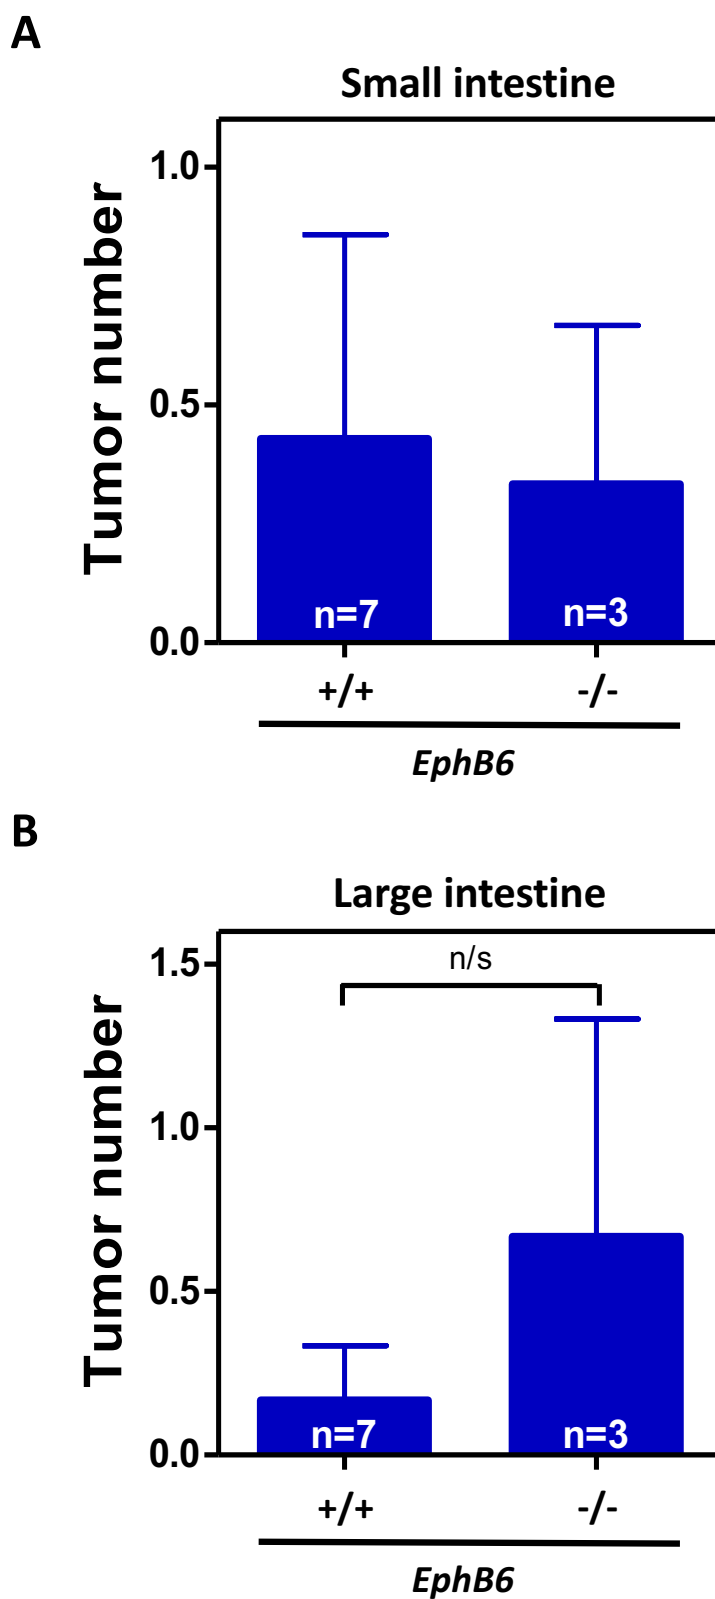

**Supplementary Figure 7: Number of tumors in *EphB6* knockout mice.** The number of tumors in *EphB6* wild type and knockout mice was assessed at 21 months of age in the small (A) and large (B) intestine. The number of animals per group (n) is shown. The mean  $\pm$  SEM is shown. n/s: non significant p value ( $p > 0.05$ ; Student's T-Test).

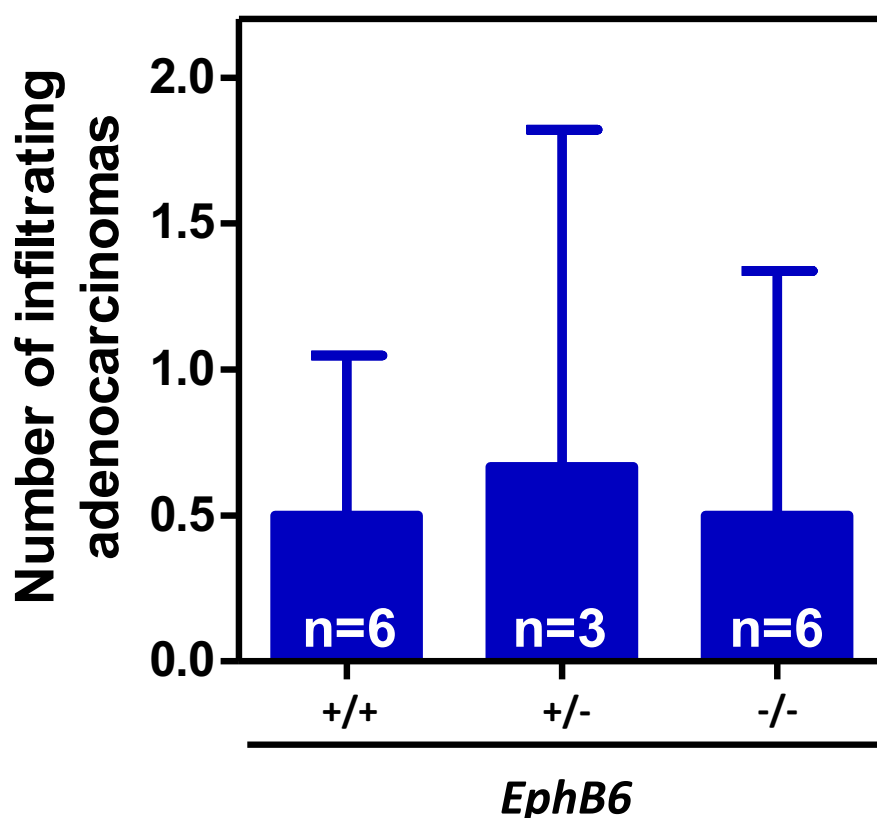

**Supplementary Figure 8: Number of invasive adenocarcinomas.** The number of infiltrating carcinomas was determined on histological sections of formalin-fixed, paraffin-embedded small intestines by an experienced pathologist blinded from the animal ID. No significant differences were observed in the number of infiltrating carcinomas in the small intestine of *Apc<sup>min/+</sup>* animals that were *EphB6* wild type, heterozygous or knockout. The mean  $\pm$  SEM is shown. n: number of animals.

A

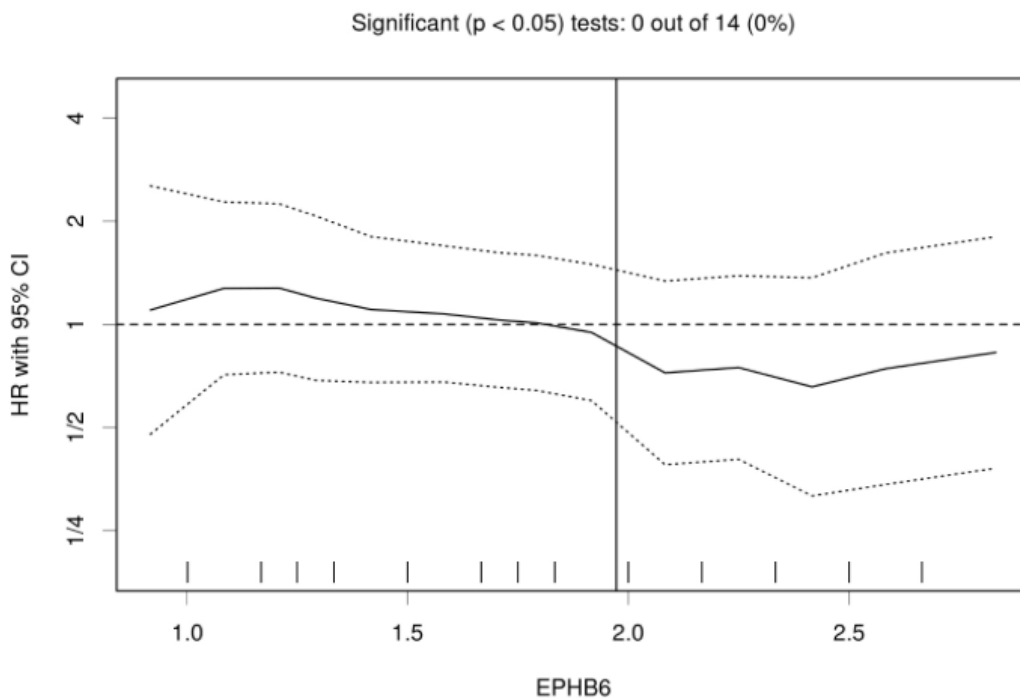

B

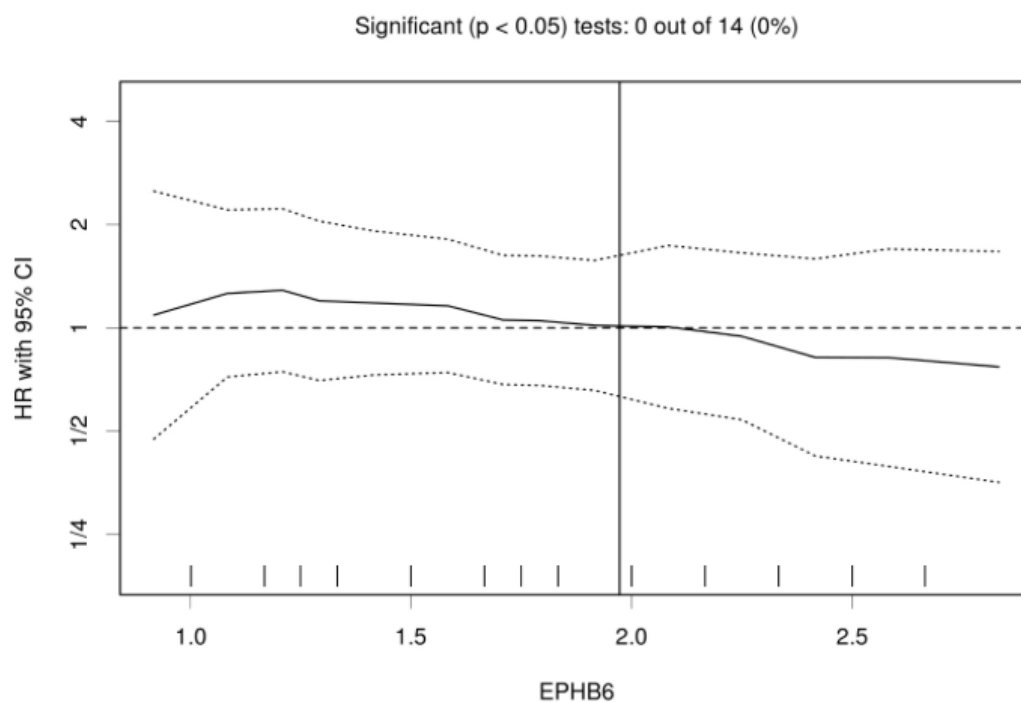

**Supplementary Figure 9: Cutoff optimization by correlation with patient survival.** For each possible cutoff, EPHB6 expression was correlated with disease-free (A) or overall survival (B). The hazard ratio (HR; solid line) including 95% confidence intervals (dotted lines) is plotted in dependence of the cutoff. A vertical line designates the dichotomization based on the distribution of EPHB6 expression levels in the sample cohort.



**Supplementary Table 1:** Clinicopathological features of the 130 Dukes C colorectal cancer patients included in the study as a function of EPHB6 expression in their tumors.

|                                              | Total      | High EPHB6    | Low EPHB6     | p value |
|----------------------------------------------|------------|---------------|---------------|---------|
| <b>Sex, n (%)</b>                            |            |               |               |         |
| Female                                       | 63 (49.3)  | 31 (54.4)     | 32 (45.1)     | 0.374   |
| Male                                         | 65 (50.7)  | 26 (45.6)     | 39 (54.9)     |         |
| <b>Age (years), mean±SD</b>                  | 66.6       | 66,65 ± 11,89 | 66,55 ± 13,07 | 0.9768  |
| <b>Site, n (%)</b>                           |            |               |               |         |
| Colon                                        | 75 (59.1)  | 33 (57.9)     | 42 (60)       | 0.8572  |
| Rectum                                       | 52 (40.9)  | 24 (42.1)     | 28 (40)       |         |
| <b>Mean follow up (years), mean±SD</b>       | 9.4        | 9,4 ± 1,03    | 9,4 ± 0,90    | 0.7729  |
| <b>5-year overall survival, n (%)</b>        |            |               |               |         |
| Alive                                        | 53 (41.5)  | 23 (40.4)     | 30 (42.3)     | 0.8584  |
| Dead                                         | 75 (58.5)  | 34 (59.6)     | 41 (57.7)     |         |
| <b>5-year disease-free survival, n (%)</b>   |            |               |               |         |
| Alive                                        | 43 (37.1)  | 20 (40)       | 23 (34.9)     | 0.6981  |
| Dead                                         | 73 (62.9)  | 30 (60)       | 43 (65.1)     |         |
| <b>Adjuvant treatment, n (%)</b>             |            |               |               |         |
| Yes                                          | 49 (41.2)  | 20 (39.3)     | 29 (42.7)     | 0.8509  |
| No                                           | 70 (58.8)  | 31 (60.7)     | 39 (57.3)     |         |
| <b>Microsatellite instability, n (%)</b>     |            |               |               |         |
| MSI                                          | 16 (12.6)  | 7 (12.3)      | 9 (12.9)      | 1       |
| MSS                                          | 111 (87.4) | 50 (87.7)     | 61 (87.1)     |         |
| <b>TP53 status, n (%)</b>                    |            |               |               |         |
| Wild type                                    | 18 (46.2)  | 9 (47.4)      | 9 (45)        | 1       |
| Mutant                                       | 21 (53.8)  | 10 (52.6)     | 11 (55)       |         |
| <b>KRAS status</b>                           |            |               |               |         |
| Wild type                                    | 32 (66.7)  | 14 (60.9)     | 18 (72)       | 0.5427  |
| Mutant                                       | 16 (33.3)  | 9 (39.1)      | 7 (28)        |         |
| <b>Allelic loss of chromosome 18q, n (%)</b> |            |               |               |         |
| LOH                                          | 38 (43.7)  | 18 (44)       | 20 (43.5)     | 1       |
| No LOH                                       | 49 (56.3)  | 23 (56)       | 26 (56.5)     |         |

Original Figure

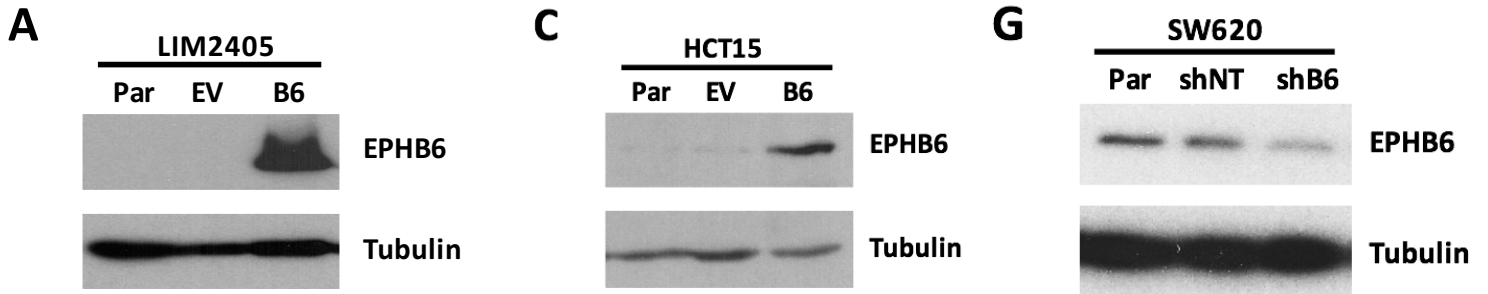

Full length blots

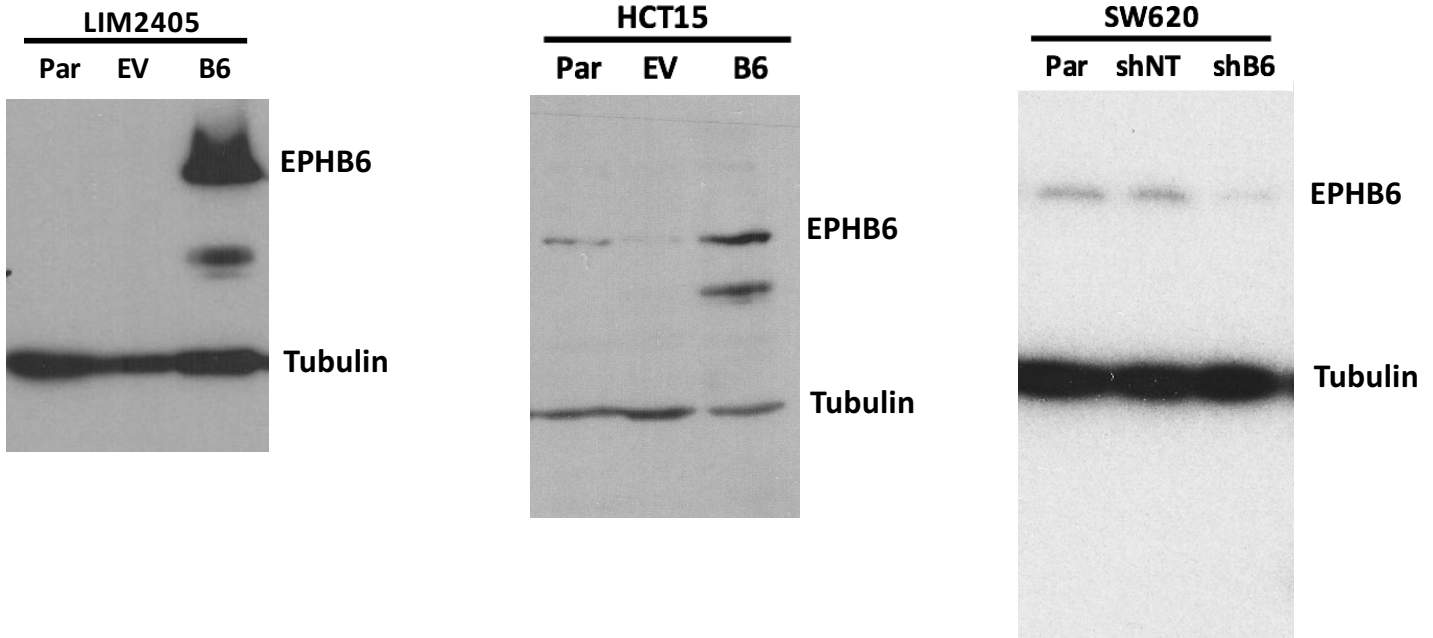

Original Figure

A

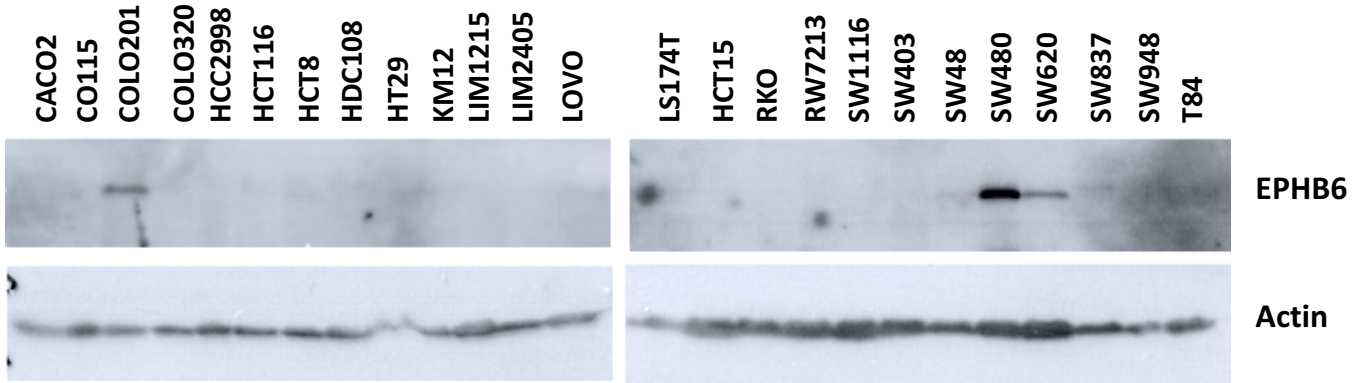

Full length blots

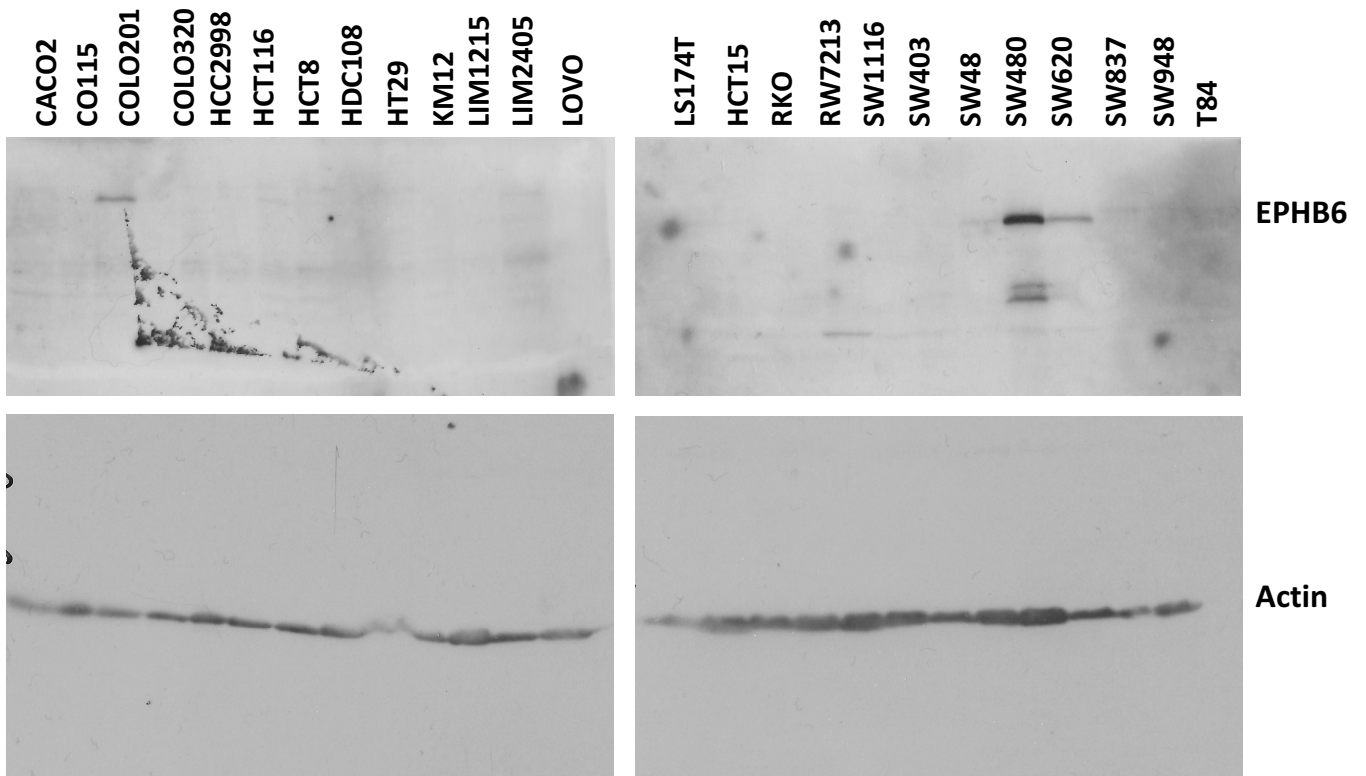

Supplement: srep43702-s1.pdf [file srep43702-s1.pdf]
